# Supplementary material for: Evaluation of irreversible protein thermal inactivation caused by breakage of disulphide bonds using methanethiosulphonate
Source: PubMed Central journal article supplement (PMC5622167; doi:10.1038/s41598-017-12748-y), 2017-09-29
Supplement: 41598_2017_12748_MOESM1_ESM.pdf [file 41598_2017_12748_MOESM1_ESM.pdf]

## Supplementary Information

### **Evaluation of irreversible protein thermal inactivation caused by breakage of disulphide bonds using methanethiosulphonate**

Junichiro Futami<sup>1\*</sup>, Ai Miyamoto<sup>1</sup>, Atsushi Hagimoto<sup>1</sup>, Shigeyuki Suzuki<sup>1</sup>, Midori Futami<sup>2</sup> and Hiroko Tada<sup>3</sup>

<sup>1</sup>Department of Medical Bioengineering, Graduate School of Natural Science and Technology, Okayama University, Okayama 700-8530, Japan

<sup>2</sup>Department of Biomedical Engineering, Faculty of Engineering, Okayama University of Science, Okayama, 700-0005, Japan

<sup>3</sup>Division of Instrumental Analysis, Department of Instrumental Analysis and Cryogenics, Advanced Science Research Center, Okayama University, Okayama 700-8530, Japan

#### **\*Corresponding author**

Junichiro Futami, Ph.D.

Department of Medical Bioengineering, Graduate School of Natural Science and Technology, Okayama University, Okayama 700-8530, Japan

Phone & Fax: 81-86-251-8217

E-mail: futamij@okayama-u.ac.jp

Supplementary information consists of Figure S1 to S4

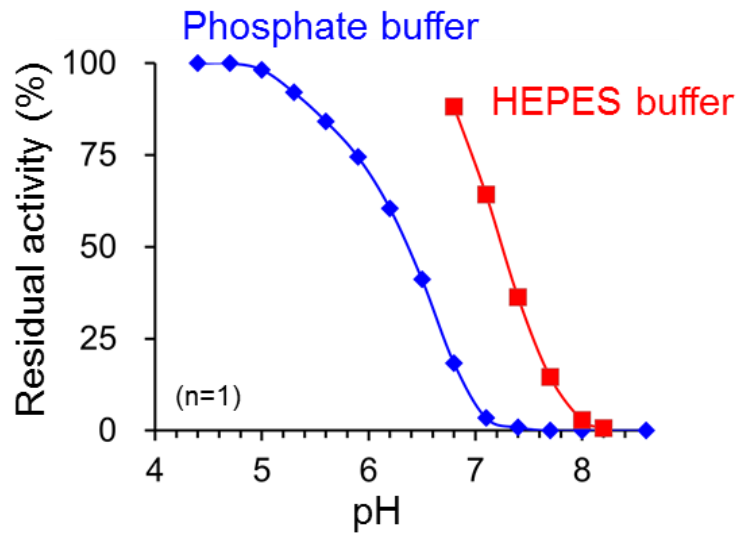

**Figure S1. pH-dependent thermostability of HEL.** HEL solubilized (1 mg/mL) in 50 mM of HEPES or phosphate buffer at various pH values were treated at 100 °C for 5 min, and then assayed for residual enzymatic activity against *Micrococcus lysodeikticus*.

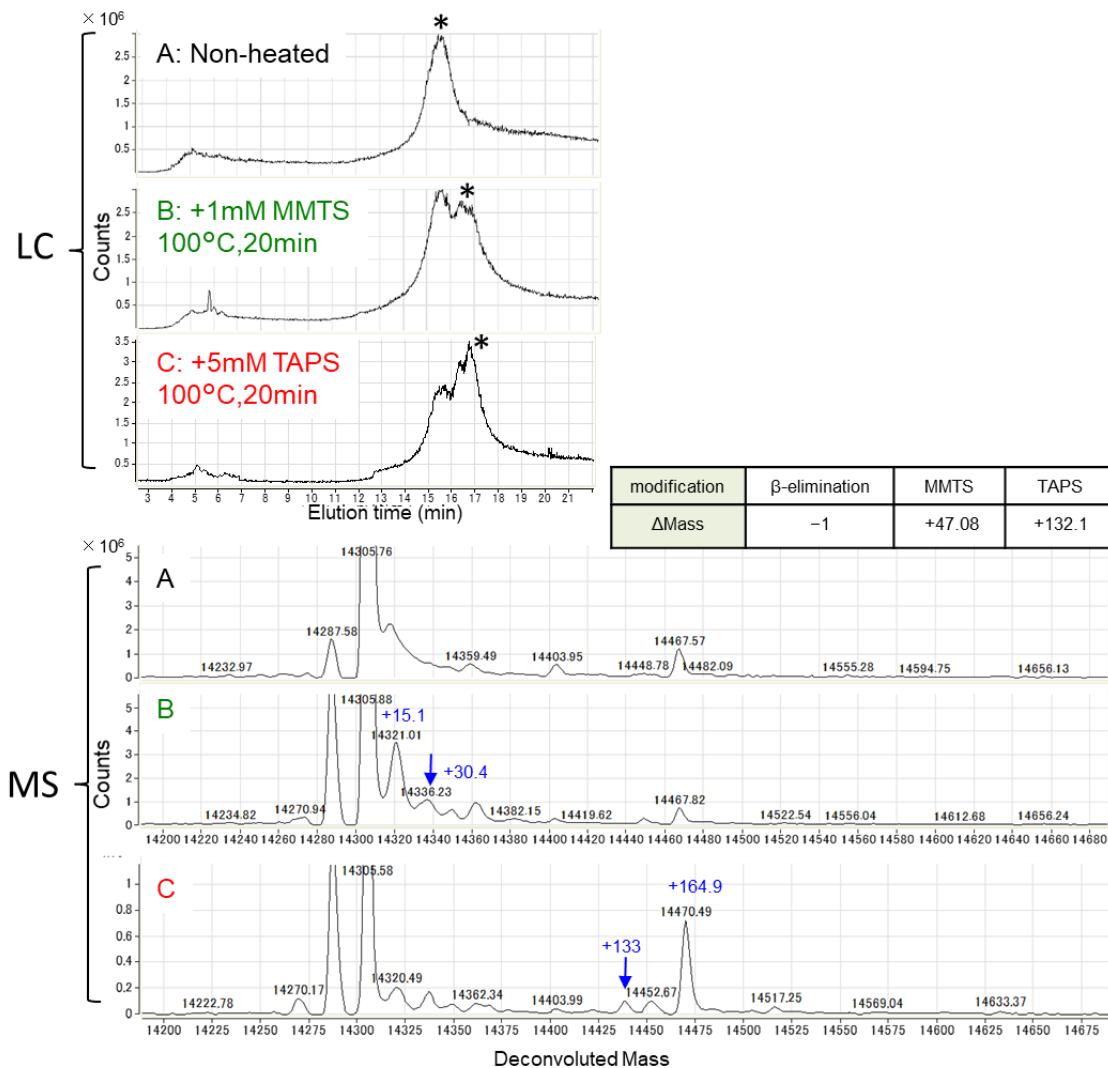

**Figure S2. Mass spectrometric analysis of HEL after heating in the presence of MTS reagents.** Deconvoluted mass spectra of non-heated HEL and heated HELs (1 mg/mL) in 50 mM HEPES buffer, pH6.8 in the presence of 1 mM MMTS (B) or 5mM TAPS-Sulfonate. Molecular mass of HEL containing in marked (\*) peak on protein-chip LC were analyzed by HPLC-CHIP/QTOF mass spectrometry (G6520 Agilent Technologies, CA, USA). Every samples showed high intensity as the mass for native HEL.

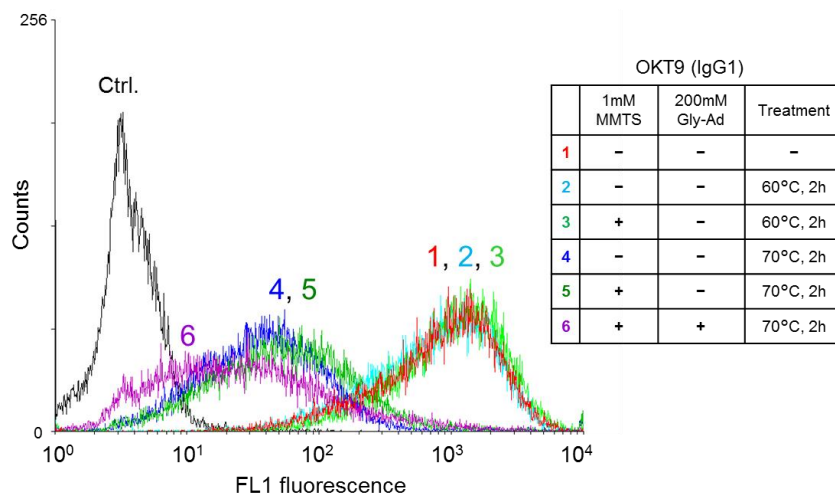

**Figure S3. Evaluation of antigen recognition activity of OKT9.** Monoclonal antibodies (mouse IgG1) against human transferrin receptor (OKT9, 1 mg/mL) with various additives were heated under the indicated conditions. After dilution of each sample to a concentration of 20  $\mu\text{g/mL}$  in PBS containing 0.1% BSA, samples were incubated with trypsinized HeLa cells for 1 h. After washing twice with PBS, cells were incubated with Alexa488-conjugated anti-mouse IgG, and used for flow cytometry analysis (Cell Lab Quanta SC, Beckman Coulter, CA, USA).

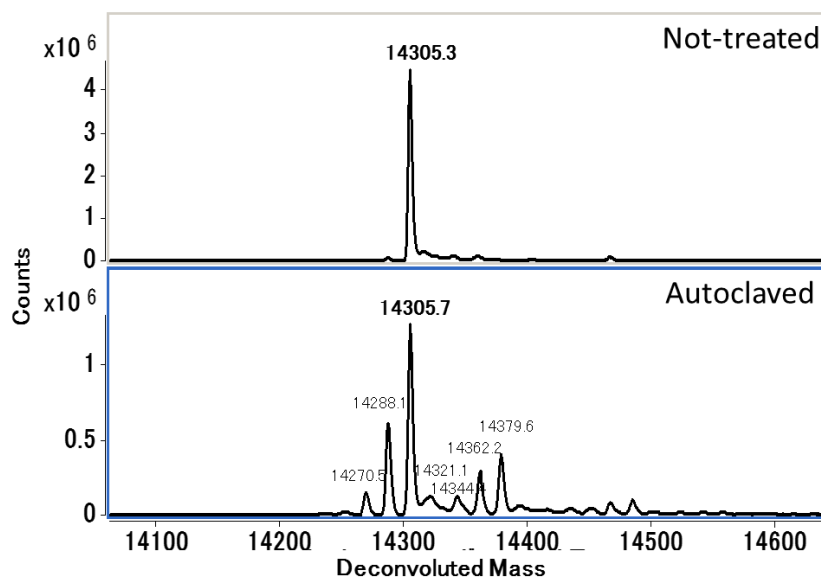

**Figure S4. Mass spectrometric analysis of HEL after autoclaving.** Deconvoluted mass spectra of non-treated HEL and autoclaved HEL in 50 mM HEPES buffer consisting of 200 mM Gly-Ad and 1 mM MMTS. Molecular mass of each sample was analyzed by HPLC-CHIP/QTOF mass spectrometry (G6520 Agilent Technologies, CA, USA).
